# Supplementary material
Source: PubMed Central journal article supplement (PMC11114014)
Supplement: 18_2014_1777_MOESM1_ESM.pdf [file 18_2014_1777_MOESM1_ESM.pdf]

**Supplementary Figure 1.** *CF10 cell responses to serum deprivation.* **A.** Trypan blue exclusion was used to determine the proportion of cells that retained membrane integrity over four days after serum withdrawal. Counts were performed using a Countess (Invitrogen) cell counter. No change in viability was observed between the serum deprived cells and cells incubated with 10% (v/v) serum (Two-way ANOVA,  $F = 2.36$ ,  $p = 0.138$ ,  $n = 4$ ). **B.** Cytotoxicity, as determined by LDH release from cells, was assayed 24 hours post serum deprivation. No significant increase in LDH release was seen following serum withdrawal (students t-test,  $t = 0.149$ ,  $p = 0.889$ ,  $n = 3$ ). **C.** Metabolism of PrestoBlue, a formazan based dye, shows a significant increase in signal over normal serum control cells (students t-test,  $t = 3.17$ ,  $p = 0.043$ ,  $n = 3$ ). **D & E.** TMRM mitochondrial membrane potential stain. **D.** Cells were loaded with mitotracker green (which accumulates in polarised mitochondria and becomes covalently linked) under normal culture conditions then transferred into serum +/- media for 30 minutes. Media was then changed to include the TMRM membrane potential dye (Invitrogen) and FRET between the two fluorophores measured. A change in FRET efficiency would be indicative of mitochondrial membrane permeabilisation, which results in functional impairment of the organelle [1,2]. No change in FRET efficiency is seen (students t-test,  $t = 0.408$ ,  $p = 0.698$ ,  $n = 4$ ) and the relative amounts of TMRM taken up by the serum deprived cells (**E**) are the same as that measured for cells incubated under normal serum conditions (students t-test,  $t = 0.637$ ,  $p = 0.548$ ,  $n = 4$ ). **F.** Proxyl-Fluorescamine spin trapping shows a significant increase in the rate of free radical binding (and therefore fluorescence production) in the serum deprived cells (students t-test,  $t = 2.473$ ,  $p = 0.045$ ,  $n = 4$ ).

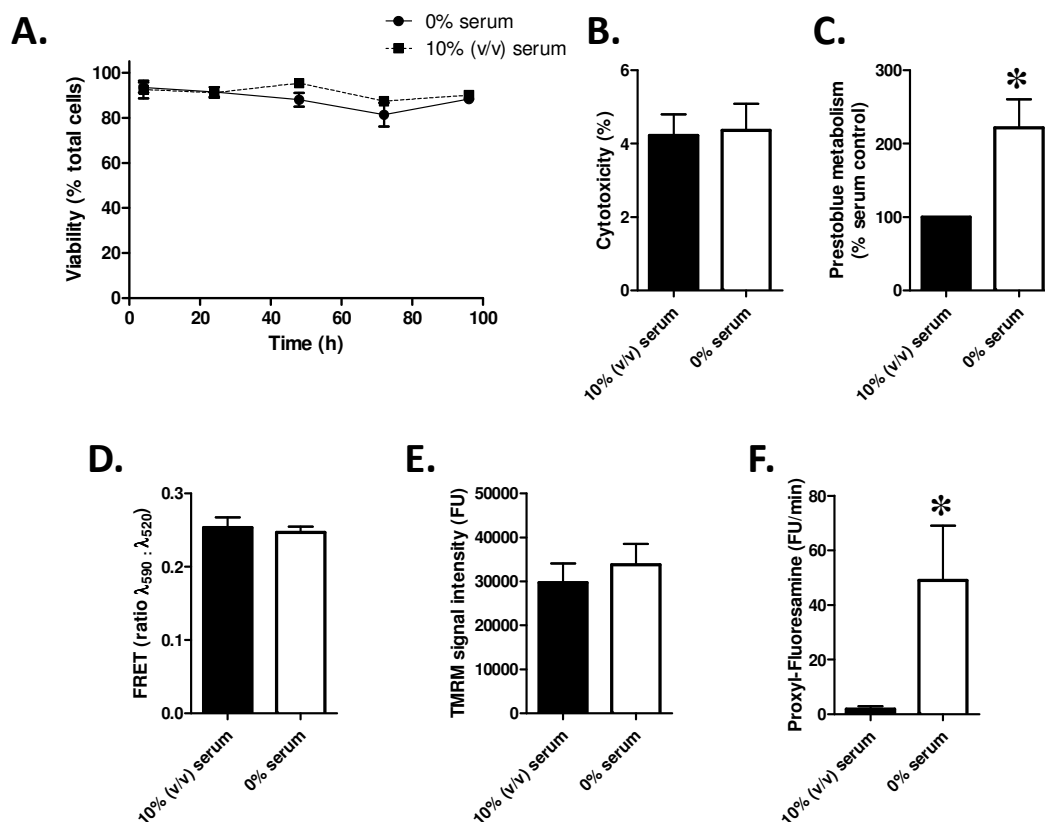

1. Elmore SP, Nishimura Y, Qian T, Herman B, Lemasters JJ (2004) Discrimination of depolarized from polarized mitochondria by confocal fluorescence resonance energy transfer. *Archives of Biochemistry and Biophysics* 422 (2):145-152. doi:<http://dx.doi.org/10.1016/j.abb.2003.12.031>
2. Galluzzi L, Zamzami N, de La Motte Rouge T, Lemaire C, Brenner C, Kroemer G (2007) Methods for the assessment of mitochondrial membrane permeabilization in apoptosis. *Apoptosis : an international journal on programmed cell death* 12 (5):803-813. doi:10.1007/s10495-007-0720-1
