# Supplementary material
Source: PubMed Central journal article supplement (PMC11114014)

**Supplementary Figure 2.** *DCF and MTS responses of the serum deprived CF10 cells treated with copper or zinc.* To determine the influence of the metal ion in the absence of the PrP23-89 peptide, cells were treated with a log<sub>10</sub> dilution of the four-molar excess (starting at 40 μM) or CuCl<sub>2</sub> or ZnCl<sub>2</sub>. Assays were carried out as described in the methods. ROS production in response to copper (A) or zinc (B) is not significantly changed from the production in response to serum deprivation (One-way ANOVA,  $p > 0.05$ ,  $n = 3$ ). (C) Both copper and zinc reduce cellular viability at 40 μM as determined by MTS metabolism (Two-way ANOVA,  $F = 18.26$ ,  $p = 0.001$ ,  $n = 3$ ).

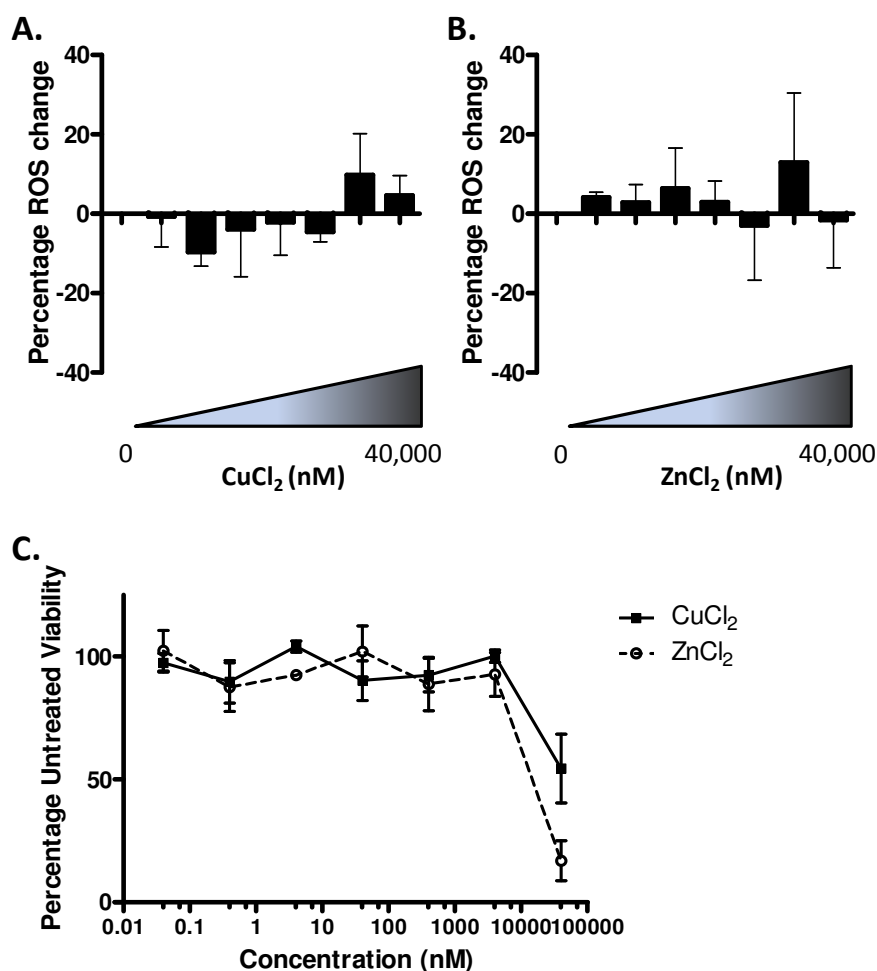

Supplement: 18_2014_1777_MOESM2_ESM.pdf [file 18_2014_1777_MOESM2_ESM.pdf]
