# Supplementary material
Source: PubMed Central journal article supplement (PMC11114014)

**Supplementary Figure 7.** *MitoSOX analysis of PrP23-50 influence on intracellular ROS production.* CF10 cells were labelled with mitoSOX fluorescent mitochondrial superoxide production indicator then incubated in normal (10% v/v serum), serum-free or serum-free with 1  $\mu$ M PrP23-50 phenol-red free OptiMEM. At 90 minutes images were collected and cellular fluorescence quantified. Shown below are representative plates of each condition and the quantification. Serum deprivation increases mitochondrial superoxide production significantly but incubation with PrP23-50 reduces this to insignificant against normal media (One-way ANOVA,  $F = 4.648$ ,  $p = 0.023$ ,  $n = 3$ ).

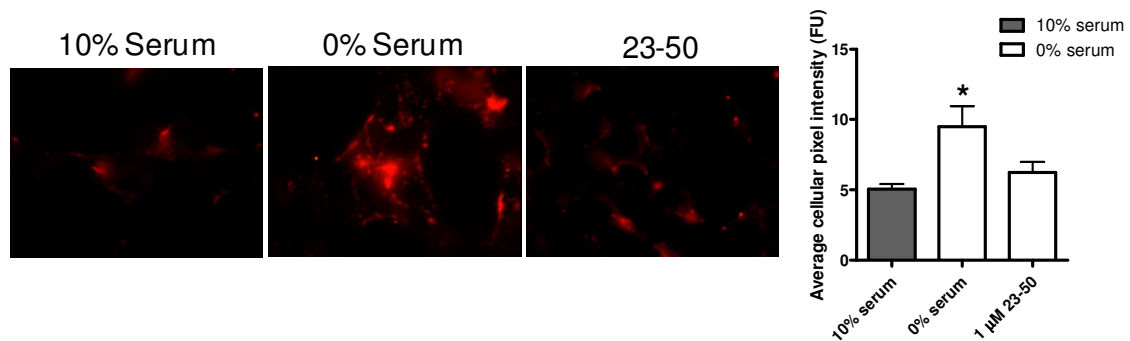

Supplement: 18_2014_1777_MOESM7_ESM.pdf [file 18_2014_1777_MOESM7_ESM.pdf]
