# Supplementary material
Source: PubMed Central journal article supplement (PMC11114014)

**Supplementary Figure 8.** *The PrP N-terminal fragments do not pull down HS or GM1 from cell lysates produced with detergent.* Dot blots for HS and GM1 of pull downs from detergent lysed cells using PrP N-terminal fragments. HS is detected only in the wash fractions and GM1 was detected only in the lysate and initial wash. No HS or GM1 signal is detected in any of the elutions indicating that when cell membranes are disrupted during lysis the epitope/complex engaged by the PrP N-terminus is disrupted.

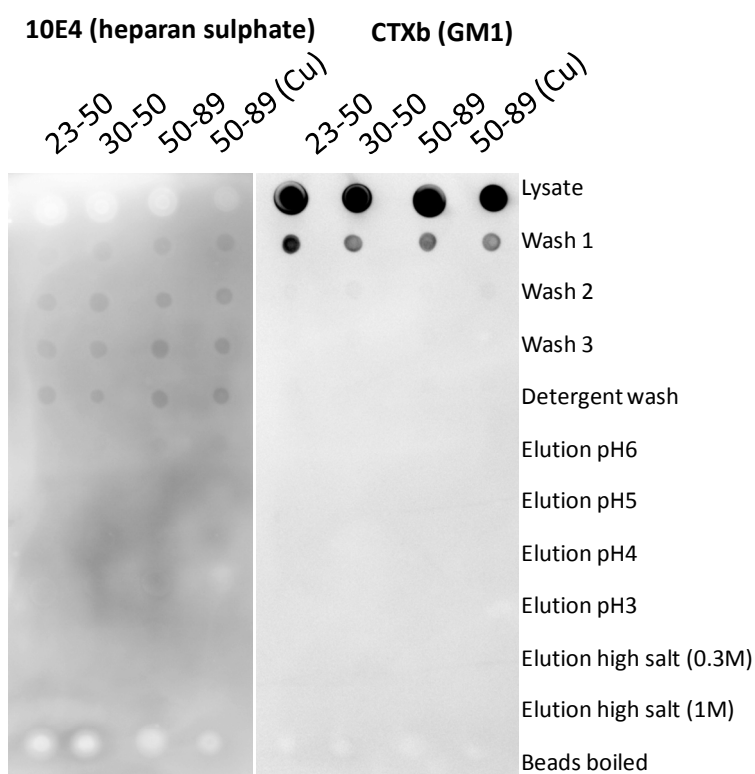

Supplement: 18_2014_1777_MOESM8_ESM.pdf [file 18_2014_1777_MOESM8_ESM.pdf]
